# Supplementary material for: Valorization of the Red Algae Gelidium sesquipedale by Extracting a Broad Spectrum of Minor Compounds Using Green Approaches
Source: MDPI journal article supplement (doi:10.3390/md19100574), 2021-10-14
Supplement: s1 [file s1]

## Supplementary Materials: Valorization of the red algae *Gelidium sesquipedale* by extracting a broad spectrum of minor compounds using green approaches

Natalia Castejón, Maroussia Parailloux, Aleksandra Izdebska, Ryszard Lobinski and Susana C. M. Fernandes

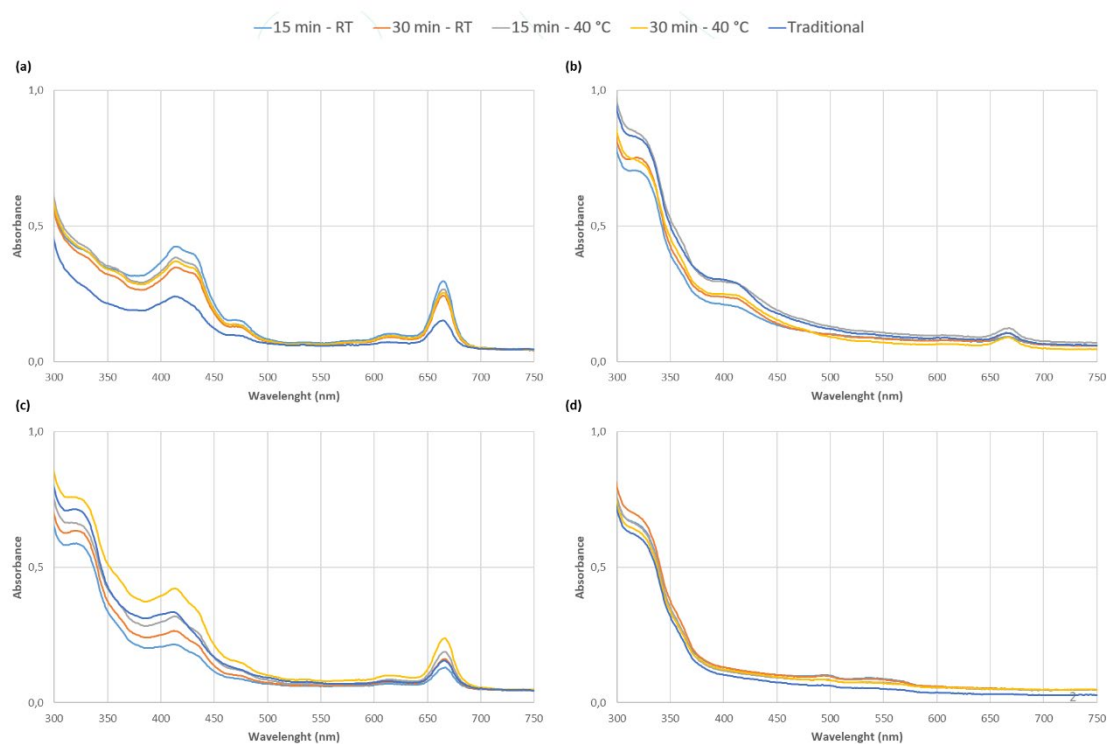

**Figure S1.** UV absorption spectra ( $\lambda=300-750$  nm) of *Gelidium sesquipedale* extracts using ultrasound-assisted extraction and conventional solvent extraction techniques: ethanol extracts (a), ethanol:water (50:50 v/v) (b), ethanol:water (70:30 v/v) (c) and water extracts (d). The graphs show the mean values ( $n=3$ ).

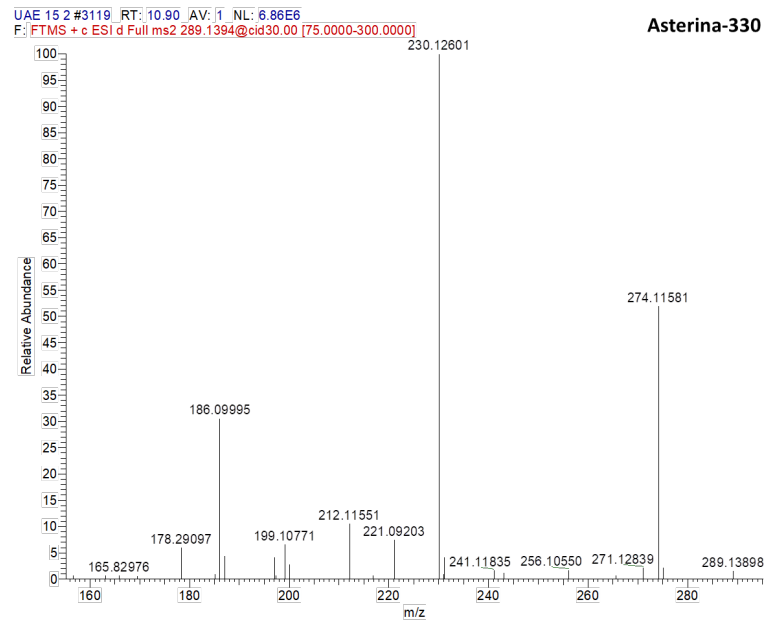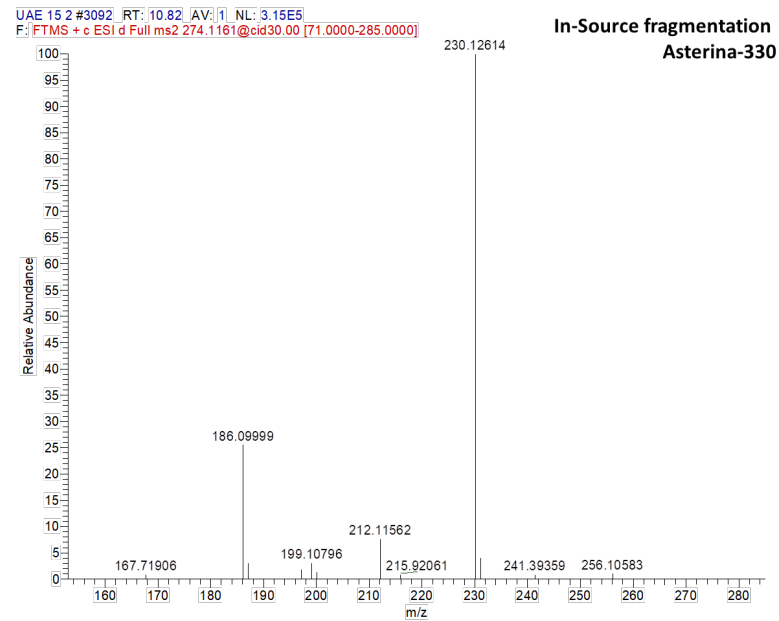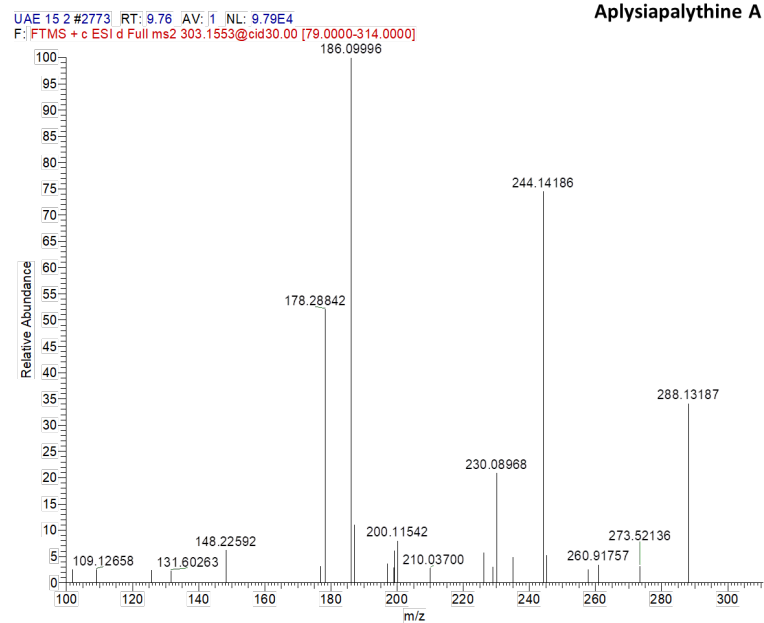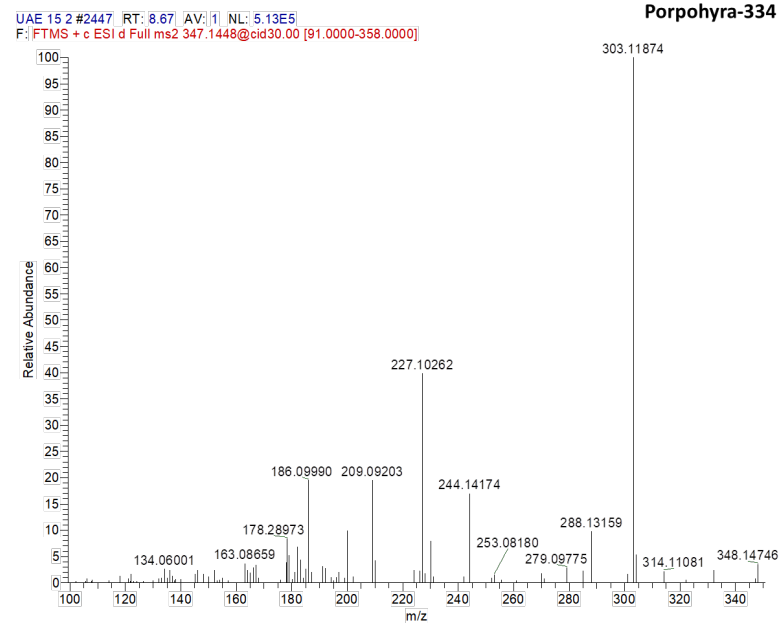

# Palythine

UAE 15 2 #2940 RT: 10.29 AV: 1 NL: 3.30E6  
F: FTMS + c ESI d Full ms2 245.1608@cid30.00 [63.0000-256.0000]

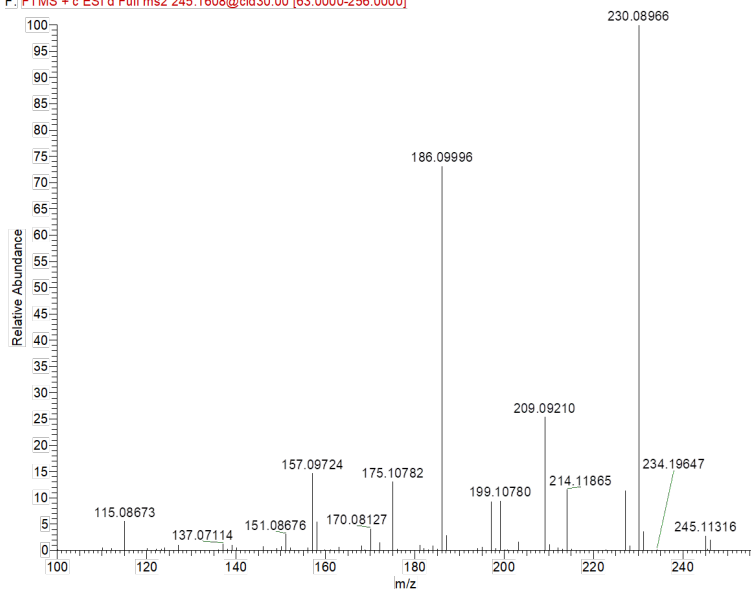

# Unknown m/z 231.1340

UAE 30 2 #3083 RT: 10.86 AV: 1 NL: 3.03E5  
F: FTMS + c ESI d Full ms2 231.1340@cid30.00 [59.0000-242.0000]

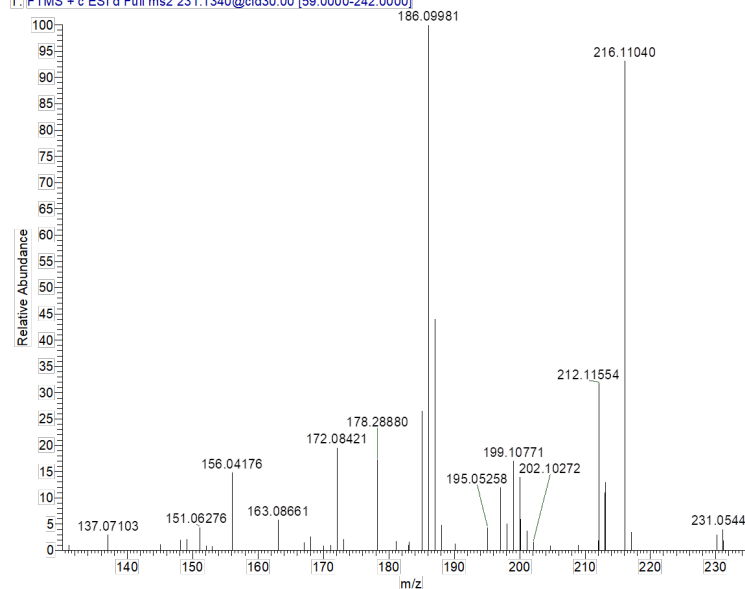

# Unknown m/z 305.1346

UAE 15 1 #2602 RT: 9.12 AV: 1 NL: 5.50E4  
F: FTMS + c ESI d Full ms2 305.1346@hcd60.00 [100.0000-500.0000]

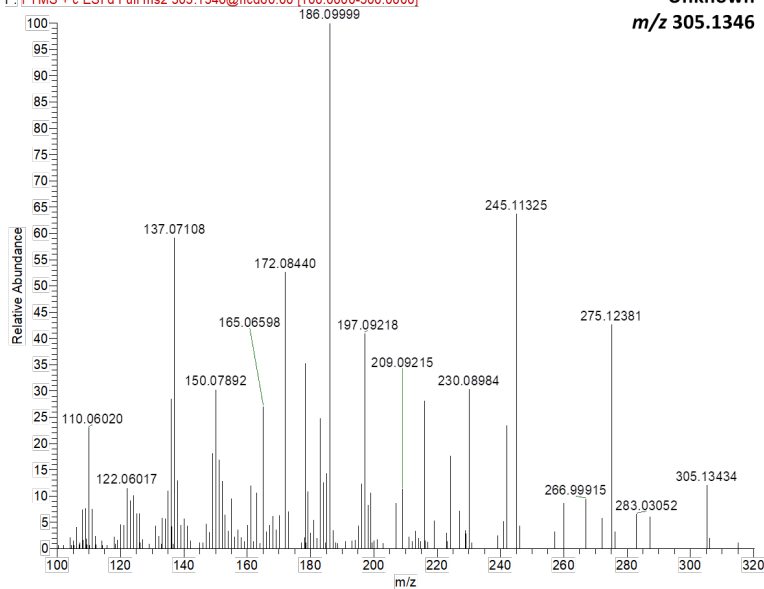

# Aplysiapalythine B

H2O 2 #2386 RT: 8.56 AV: 1 NL: 3.61E5  
F: FTMS + c ESI d Full ms2 273.1443@cid30.00 [71.0000-284.0000]

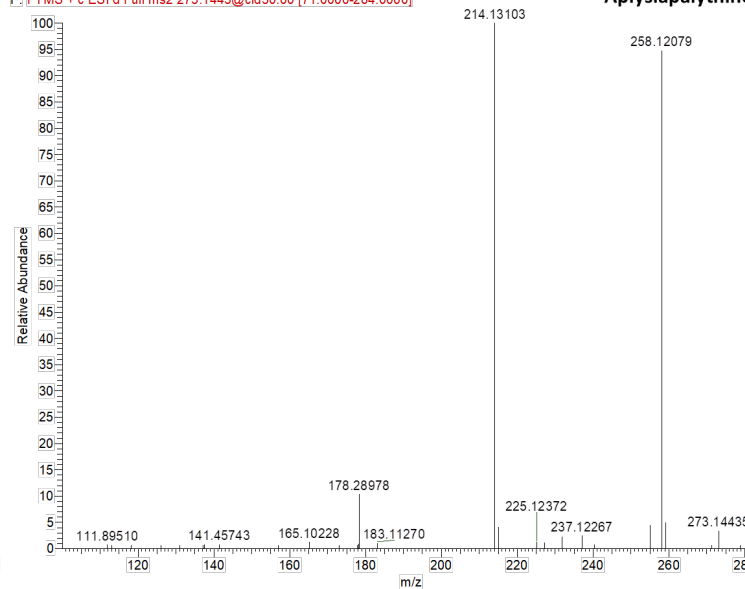

UAE 15 2 #2602 RT: 9.17 AV: 1 NL: 6.88E5  
 F: FTMS + c ESI d Full ms2 333.1293@cid30.00 [87.0000-344.0000]

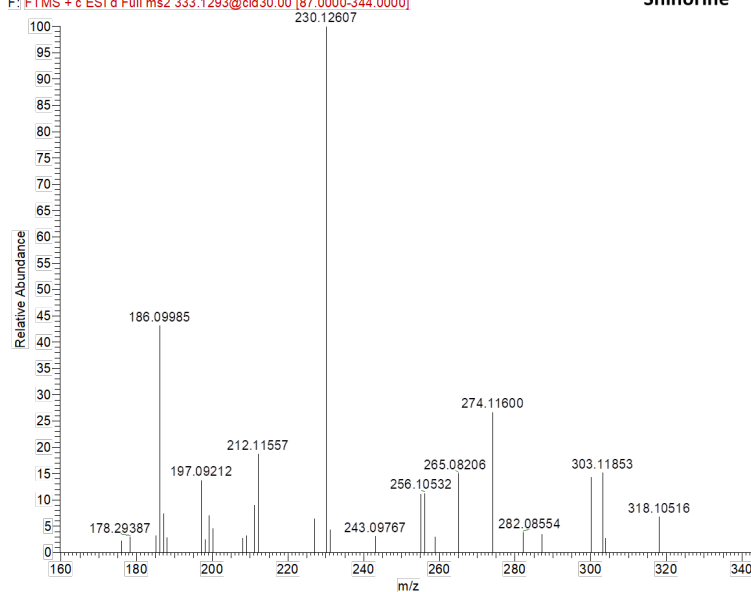

**Shinorine**

UAE 30 2 #3080 RT: 10.85 AV: 1 NL: 6.31E4  
 F: FTMS + c ESI d Full ms2 259.1288@cid30.00 [67.0000-270.0000]

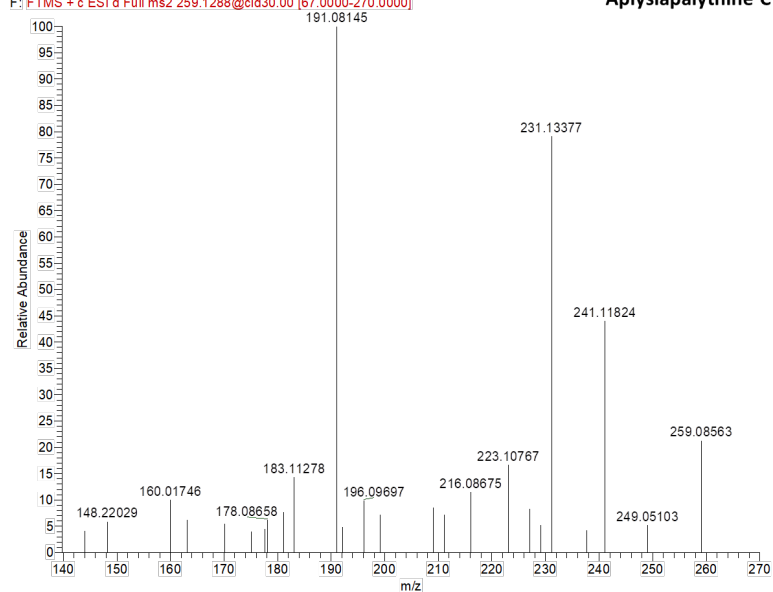

**Aplysiapalythine C**

MS<sup>2</sup> Spectra of candidate-MAAs identified in the algal specie *Gelidium sesquipedale*. Here was shown fragmentation data collection acquired at CID30, HCD50 and HCD60+/-20.
